# Supplementary material
Source: PubMed Central journal article supplement (PMC8595851)
Supplement: NIHMS1749220-supplement-Supp_Figure.pdf [file NIHMS1749220-supplement-Supp_Figure.pdf]

**Family Quality of Life Survey respondents**

**(n=211)**

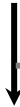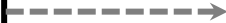

*Exclude male caregivers  
(n=18)*

**Female caregivers**

**(n=193)**

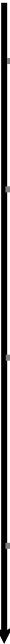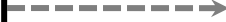

*Exclude Hawaii residents  
(n=2)*

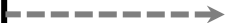

*Exclude caregivers of  
persons 18 years or older  
(n=74)*

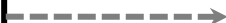

*Exclude caregivers of  
persons with phenotype  
not ascertainable  
(n=16)*

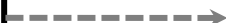

*Exclude caregivers of  
persons with unknown  
ambulation status  
(n=5)*

**Caregivers of males  
with DBMD age <18**

**(n=96)**
